# Supplementary material for: A new method using rapid Nanopore metagenomic cell-free DNA sequencing to diagnose bloodstream infections: a prospective observational study
Source: bioRxiv or medRxiv preprint supplement (doi:10.1101/2024.05.09.24307053), 2024-05-10
Supplement: Supplementary file [file media-1.pdf]

1 **Appendix**

2  
3 **Rapid metagenomic DNA sequencing to diagnose bloodstream infections in patients**  
4 **admitted to the emergency ward**  
5 **Nielsen et al.**  
6

7 **Table of contents**

8 Supplementary Methods .....2  
9 Potential clinical impact analysis .....2  
10 Statistical analysis .....2  
11 Supplementary Figures .....3  
12 Figure S1. Clinical characteristics of patients who were analyzed and excluded. ....3  
13 Figure S2. Clinical characteristics for patients in BSI-suspected with negative and positive mNGS results. ....4  
14 Supplementary Tables .....5  
15 Table S1. Detailed metadata on clinical presentation for all patients. ....5  
16 Table S2. Detailed metadata on the assessment of relevance of mNGS findings. ....8  
17 Table S3. Read depth and plasma cfDNA concentration for all patients and blood donors. ....11  
18 References .....13

19  
20

21 **Supplementary Methods**

22 **Potential clinical impact analysis**

23 Patient courses were evaluated for 3 different potential impact types. Firstly, a change from ineffective to effective  
24 antibiotic treatment, when DNA sequencing results could have led to a correction from ineffective (either due to  
25 antibiotic resistance or the antibiotic not covering the pathogen) to effective antibiotic treatment. This was adjudicated  
26 only when the first-line antibiotic against the pathogen identified by DNA sequencing would have been effective.  
27 Secondly, an addition of an extra antibiotic for coverage, when DNA sequencing results could have led to the addition  
28 of one or more extra antibiotics to cover all identified pathogens relevant to the acute infection. Thirdly, extended  
29 treatment, when the finding of a pathogen in the blood with DNA sequencing, that was already covered by the  
30 antibiotic treatment could have led doctors to consider prolonging IV antibiotic treatment and admission. Only the  
31 pathogens from mNGS adjudicated by the clinical microbiologists as relevant were considered in the impact analysis.  
32 In the assessment of impact all of a patient's positive clinical microbiology diagnostics were considered, and e.g. a  
33 change to effective treatment was only adjudicated if no relevant diagnostic answers were available at the time (6  
34 hours post admission) to guide the treatment. Negative mNGS answers were not assessed for potential in guiding  
35 deescalations.

36 **Statistical analysis**

37 The comparison of mNGS results to gold-standard blood culturing was conducted as follows: a true positive was  
38 adjudicated when at least one pathogen identified by mNGS was in accordance with blood culturing; a true negative  
39 was adjudicated when no pathogens were identified by neither blood culture or mNGS; a false positive was adjudicated  
40 when blood culture was negative and mNGS was positive; a false negative was adjudicated when blood culture was  
41 positive and mNGS was negative for that pathogen.<sup>2</sup>

42  
43 If not specified otherwise, a two-sided Wilcoxon-Mann-Whitney test was used to compare distributions. In case of  
44 multiple comparisons, the p-values were adjusted with the Holm-Bonferoni method. All statistical analyses were  
45 conducted in R (version 4.2.0).

46 **Supplementary Figures**

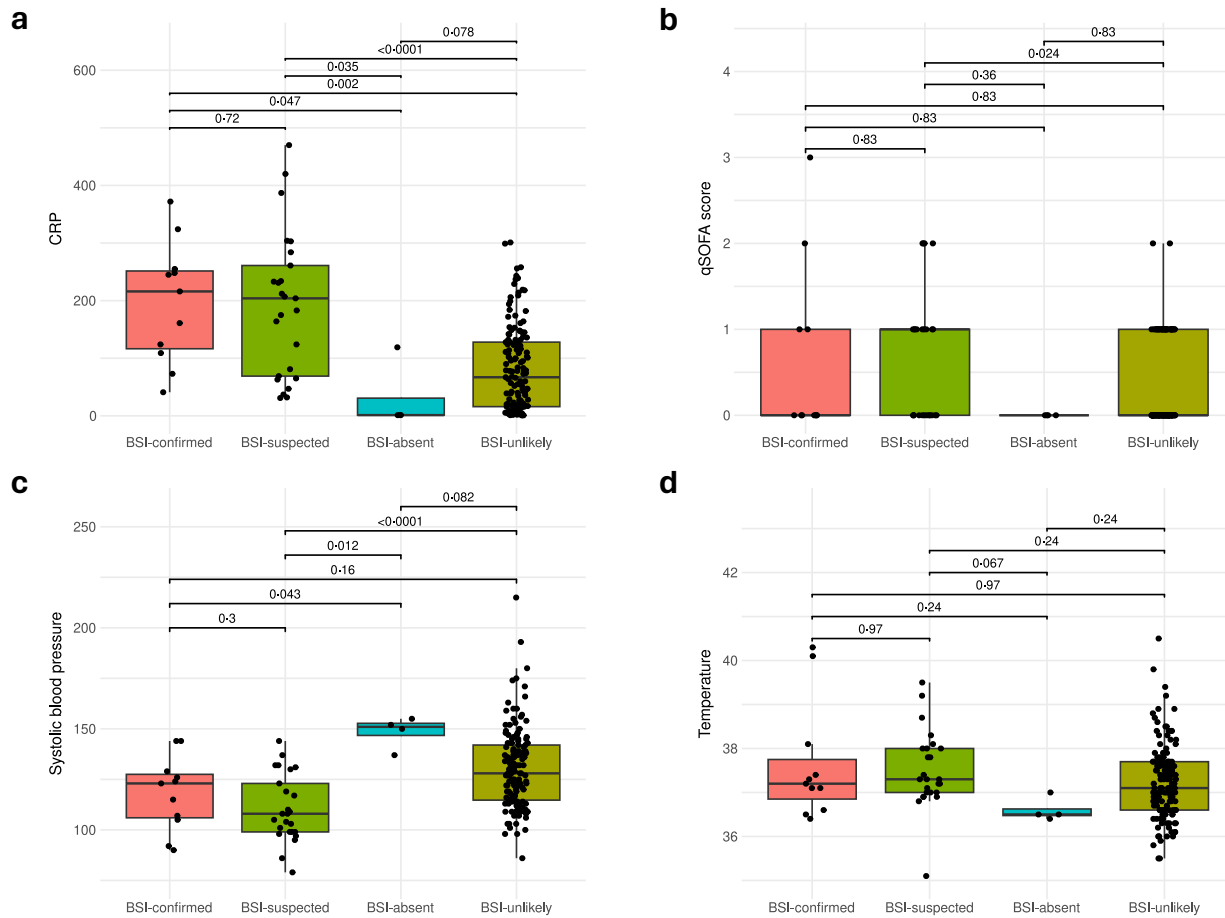

47

48 **Figure S1. Clinical characteristics of patients who were analyzed and excluded.**

49 a) CRP at blood culture for BSI-confirmed, BSI-suspected, BSI-absent, and BSI-unlikely groups. b) qSOFA score at  
 50 blood culture for the four groups. c) Systolic blood pressure at blood culture for the four groups. d) Temperature at  
 51 blood culture for the four groups.

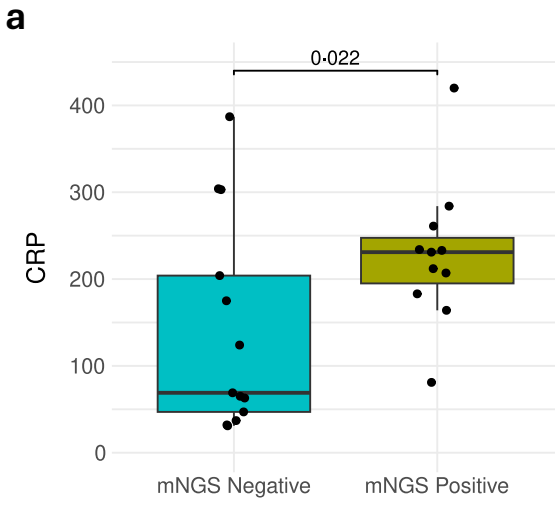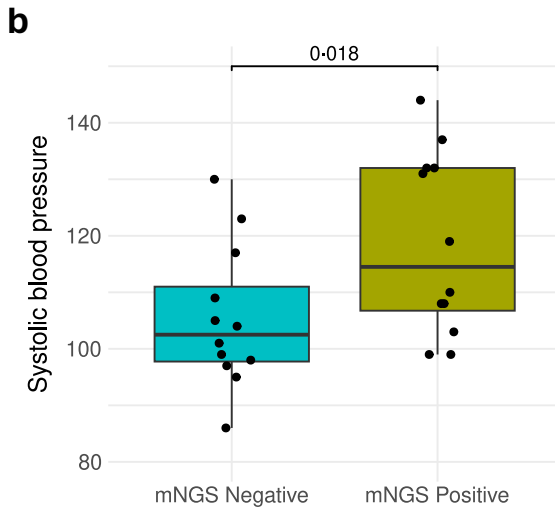

52

53 **Figure S2. Clinical characteristics for patients in BSI-suspected with negative and positive mNGS results.**

54 a) CRP at blood culture. b) Systolic blood pressure at blood culture.

55 **Supplementary Tables**56 **Table S1. Detailed metadata on clinical presentation and antibiotics for all patients.**

57

| Patient | Suspected primary infection site | CRP (mg/L) | Systolic blood pressure (mmHg) | Temperature (°C) | WBC (10 <sup>3</sup> cells/mm <sup>3</sup> ) | RF (1/min) | GCS | qSOFA | Antibiotics prior to admission | Antibiotics during admission                                                                |
|---------|----------------------------------|------------|--------------------------------|------------------|----------------------------------------------|------------|-----|-------|--------------------------------|---------------------------------------------------------------------------------------------|
| p001    | LRI                              | 109        | 124                            | 40.1             | 10.3                                         | 30         | 13  | 2     |                                | Gentamicine   Cefuroxime   Benzylpenicillin   Ampicillin   Piperacillin/tazobactam          |
| p002    | UTI                              | 216        | 90                             | 36.6             | 10.7                                         | 24         | 14  | 3     |                                | Gentamicin   Piperacillin/tazobactam   Meropenem   Ciprofloxacin   Ampicillin               |
| p020    | UTI                              | 161        | 115                            | 36.4             | 14.8                                         | 20         | 15  | 0     |                                | Piperacillin/tazobactam   Mecillinam   Pivmecillinam                                        |
| p028    | LRI                              | 255        | 105                            | 37.1             | 24.8                                         | 24         | 15  | 1     |                                | Amoxicillin   Piperacillin/tazobactam                                                       |
| p098    | Idiopathic pancreatitis          | 73         | 144                            | 37.3             | 14.5                                         | 16         | 15  | 0     |                                | Piperacillin/tazobactam   Metronidazole                                                     |
| p104    | Infection w.o. focus             | 41         | 123                            | 36.5             | 7.5                                          | 16         | 15  | 0     |                                | Piperacillin/tazobactam   Ciprofloxacin   Vancomycin                                        |
| p139    | Infection w.o. focus             | 248        | 129                            | 37.4             | 5.3                                          | 18         | 15  | 0     |                                | Piperacillin/tazobactam   Ciprofloxacin                                                     |
| p141    | Knee                             | 324        | 144                            | 37.2             | 5.3                                          | 12         | 15  | 0     |                                | Cloxacillin   Dicloxacillin   Benzylpenicillin   Cefuroxime                                 |
| p172    | UTI                              | 245        | 107                            | 40.3             | 17.1                                         | 16         | 15  | 0     |                                | Gentamicin   Ampicillin   Piperacillin/tazobactam   Pivmecillinam   Phenoxymethylpenicillin |
| p175    | Infection w.o. focus             | 124        | 92                             | 38.1             | 13.6                                         | 19         | 15  | 1     |                                | Piperacillin/tazobactam   Vancomycin                                                        |
| p183    | UTI                              | 372        | 126                            | 37.1             | 19.4                                         | 18         | 15  | 0     |                                | Piperacillin/tazobactam   Ampicillin   Metronidazole                                        |
| p012    | Infection w.o. focus             | 204        | 86                             | 36.8             | 7.6                                          | 23         | 15  | 2     | Metronidazole                  | Nystatin   Amoxicillin   Piperacillin/tazobactam                                            |
| p018    | PICC-line infection              | 37         | 95                             | 36.9             | 4.8                                          | 12         | 15  | 1     |                                | Benzylpenicillin   Fluconazole   Ampicillin   Anidulafungin                                 |
| p019    | LRI                              | 284        | 103                            | 38               | 10.8                                         | 22         | 15  | 1     |                                | Ampicillin   Gentamicin   Piperacillin/tazobactam                                           |
| p022    | Infection w.o. focus             | 175        | 101                            | 35.1             | 18.1                                         | 16         | 15  | 0     | Phenoxymethylpenicillin        | Ampicillin   Piperacillin/tazobactam   Moxifloxacin                                         |

|      |                         |     |     |      |      |    |    |   |                       |                                                                                                   |
|------|-------------------------|-----|-----|------|------|----|----|---|-----------------------|---------------------------------------------------------------------------------------------------|
| p027 | Skin                    | 63  | 99  | 37.3 | 10.9 | 18 | 15 | 1 |                       | Fluconazole   Clarithromycin<br>  Piperacillin/tazobactam  <br>Dicloxacillin                      |
| p047 | LRI                     | 124 | 130 | 39.2 | 23.3 | 22 | 15 | 1 |                       | Benzylpenicillin  <br>Piperacillin/tazobactam  <br>Amoxicillin                                    |
| p049 | LRI                     | 420 | 131 | 37.3 | 27.7 | 16 | 15 | 0 |                       | Cefuroxime   Clarithromycin  <br>Roxithromycin  <br>Moxifloxacin                                  |
| p072 | UTI                     | 207 | 144 | 37   | 15.5 | 16 | 15 | 0 | Pivmecillinam         | Ampicillin   Pivampicillin  <br>Pivmecillinam   Gentamicin                                        |
| p091 | UTI                     | 261 | 108 | 37.2 | 12.3 | 14 | 15 | 0 |                       | Piperacillin/tazobactam  <br>Pivmecillinam                                                        |
| p092 | UTI                     | 212 | 108 | 37   | 10   | 14 | 15 | 0 |                       | Piperacillin/tazobactam  <br>Pivmecillinam                                                        |
| p105 | LRI                     | 233 | 137 | 38.7 | 23.4 | 22 | 15 | 1 | Azithromycin          | Clarithromycin  <br>Benzylpenicillin  <br>Piperacillin/tazobactam  <br>Amoxicillin   Moxifloxacin |
| p106 | LRI                     | 387 | 117 | 37   | 13.1 | 22 | 15 | 1 | Unknown<br>antibiotic | Piperacillin/tazobactam  <br>Phenoxyethylpenicillin                                               |
| p114 | LRI                     | 69  | 97  | 37.2 | 12.3 | 22 | 15 | 2 |                       | Benzylpenicillin  <br>Amoxicillin                                                                 |
| p127 | Diverticulitis          | 183 | 99  | 37.1 | 16.3 | 22 | 15 | 2 |                       | Metronidazole  <br>Benzylpenicillin   Gentamicin<br>  Amoxicillin                                 |
| p128 | LRI                     | 470 | 99  | 36.9 | 12.2 | 20 | 15 | 1 |                       | Benzylpenicillin  <br>Phenoxyethylpenicillin                                                      |
| p136 | Psoas                   | 303 | 105 | 37.8 | 15.4 | 12 | 15 | 0 | Unknown<br>antibiotic | Metronidazole  <br>Piperacillin/tazobactam  <br>Fluconazole                                       |
| p140 | UTI                     | 81  | 132 | 38   | 13.6 | 16 | 15 | 0 | Pivmecillinam         | Ampicillin   Gentamicin  <br>Pivmecillinam                                                        |
| p143 | Decubitus os<br>sacrum  | 231 | 110 | 37.8 | 14.1 | 18 | 14 | 1 |                       | Cefuroxime   Amoxicillin                                                                          |
| p146 | Skin                    | 65  | 104 | 36.9 | 10.5 | 18 | 15 | 0 |                       | Benzylpenicillin   Cloxacillin<br>  Phenoxyethylpenicillin                                        |
| p150 | LRI                     | 31  | 109 | 39.5 | 1.4  | 18 | 15 | 0 |                       | Ciprofloxacin  <br>Piperacillin/tazobactam  <br>Gentamicin   Meropenem                            |
| p151 | Infection<br>w.o. focus | 304 | 123 | 38.1 | 13   | 16 | 15 | 0 |                       | Cefuroxime   Trimethoprim                                                                         |
| p156 | LRI                     | 47  | 79  | 37.4 | 28.9 | 20 | 15 | 1 |                       | Piperacillin/tazobactam  <br>Amoxicillin                                                          |
| p162 | LRI                     | 32  | 98  | 37.3 | 9.4  | 28 | 15 | 2 |                       | Meropenem   Ciprofloxacin                                                                         |

|      |     |     |     |      |      |    |    |   |                                               |
|------|-----|-----|-----|------|------|----|----|---|-----------------------------------------------|
| p164 | UTI | 234 | 119 | 38.3 | 7.3  | 14 | 15 | 0 | Piperacillin/tazobactam  <br>Ciprofloxacin    |
| p173 | UTI | 164 | 132 | 38   | 10   | 14 | 15 | 0 | Vancomycin   Pivmecillinam  <br>Ciprofloxacin |
| p016 |     | 119 | 152 | 36.5 | 9.8  | 14 | 15 | 0 |                                               |
| p059 |     | 1.2 | 155 | 36.4 | 6.4  | 20 | 15 | 0 |                                               |
| p068 |     | 1.3 | 150 | 36.5 | 10.1 | 16 | 15 | 0 |                                               |
| p120 |     | 1.3 | 137 | 37   | 9.6  | 16 | 15 | 0 | Dicloxacillin                                 |

58 Abbreviations: RF = Respiratory frequency, WBC = White blood cell count, CRP = C-reactive protein, qSOFA =  
59 Quick Sequential Organ Failure Assessment,<sup>3</sup> GCS = Glasgow Coma Scale.

60 **Table S2. Detailed metadata on the assessment of relevance of mNGS findings.**

| Patient | Blood culture result              | Secondary microbiology result                                       | mNGS result (GPM)                                                         | Clinical relevance of mNGS result | Potential impact on antibiotic treatment | Comments related to treatment impact                                                                                                             |
|---------|-----------------------------------|---------------------------------------------------------------------|---------------------------------------------------------------------------|-----------------------------------|------------------------------------------|--------------------------------------------------------------------------------------------------------------------------------------------------|
| p001    | <i>Enterococcus faecalis</i>      | Urine: <i>E. faecalis</i>                                           | <i>E. faecalis</i> (1)                                                    | Confirmed                         | Change                                   | From gentamicin and cefuroxime to ampicillin                                                                                                     |
| p002    | <i>Escherichia coli</i>           | Urine: <i>E. coli</i> ,<br>Urine:<br><i>Enterococcus</i> spp.       | <i>E. coli</i> (20·8)                                                     | Confirmed                         | None                                     |                                                                                                                                                  |
| p020    | <i>E. coli</i>                    | Urine: <i>E. coli</i>                                               | <i>E. coli</i> (1·6)                                                      | Confirmed                         | None                                     |                                                                                                                                                  |
| p028    | <i>E. coli</i>                    | Urine: <i>E. coli</i>                                               | <i>E. coli</i> (41·3)                                                     | Confirmed                         | None                                     |                                                                                                                                                  |
| p098    | <i>E. coli</i>                    |                                                                     | <i>E. coli</i> (0·9)                                                      | Confirmed                         | None                                     |                                                                                                                                                  |
| p104    | <i>Staphylococcus epidermidis</i> |                                                                     | <i>S. epidermidis</i> (52·4)<br>KSHV (1)                                  | Confirmed                         | Change                                   | From piperacillin/tazobactam to vancomycin                                                                                                       |
| p139    | <i>E. coli</i>                    |                                                                     | <i>E. coli</i> (102·2)<br><i>Enterococcus faecium</i> (0·7)<br>CMV (26·6) | Confirmed                         | Addition                                 | Addition of antiviral treatment                                                                                                                  |
| p141    | <i>Staphylococcus aureus</i>      | Urine: <i>S. aureus</i> ,<br>Joint: <i>S. aureus</i>                | <i>S. aureus</i> (31)                                                     | Confirmed                         | Change                                   | Patient was discharged without any antibiotic treatment and readmitted and started cloxacillin the next day when the blood culture was positive. |
| p172    | <i>E. coli</i>                    | Urine: <i>E. coli</i>                                               | <i>E. coli</i> (59·4)                                                     | Confirmed                         | None                                     |                                                                                                                                                  |
| p175    | <i>S. epidermidis</i>             | Urine:<br><i>Enterococcus</i> spp.                                  | <i>S. epidermidis</i> (53·8)                                              | Confirmed                         | Change                                   | From piperacillin/tazobactam to vancomycin                                                                                                       |
| p183    | <i>E. coli</i>                    | Urine: <i>E. coli</i> ,<br>Feces:<br><i>Clostridiodes difficile</i> | <i>E. coli</i> (320·8)<br><i>Citrobacter koseri</i> (2·4)                 | Confirmed                         | None                                     |                                                                                                                                                  |



|      |  |                                                                    |                                                                                                                                                                               |                       |            |                                                                                 |
|------|--|--------------------------------------------------------------------|-------------------------------------------------------------------------------------------------------------------------------------------------------------------------------|-----------------------|------------|---------------------------------------------------------------------------------|
| p019 |  |                                                                    | <i>E. coli</i> (58·7)<br><i>Haemophilus influenzae</i> (13·4)<br><i>Rothia dentocariosa</i> (4·5)<br><i>Streptococcus anginosus</i> (4·6)<br><i>Veillonella atypica</i> (6·5) | Probable              | None       |                                                                                 |
| p049 |  |                                                                    | <i>Proteus mirabilis</i> (0·5)                                                                                                                                                | Possible <sup>a</sup> | None       |                                                                                 |
| p072 |  |                                                                    | <i>E. coli</i> (2·8)                                                                                                                                                          | Probable              | Escalation | Extended duration of IV antibiotic treatment                                    |
| p091 |  | Urine: <i>E. coli</i>                                              | <i>E. coli</i> (1·8)                                                                                                                                                          | Probable              | Escalation | Extended duration of IV antibiotic treatment                                    |
| p092 |  | Urine: <i>E. coli</i>                                              | <i>E. coli</i> (0·9)<br><i>H. pylori</i> (13·8)                                                                                                                               | Probable              | None       |                                                                                 |
| p105 |  | BAL:<br><i>Pseudomonas aeruginosa</i>                              | <i>P. aeruginosa</i> (121·6)                                                                                                                                                  | Probable              | Change     | From penicillin and clarithromycin to piperacillin/tazobactam and ciprofloxacin |
| p127 |  |                                                                    | <i>Raoultella planticola</i> (0·6)                                                                                                                                            | Probable              | Escalation | Peroral escalation from amoxicillin to ciprofloxacin                            |
| p128 |  |                                                                    | <i>S. pneumoniae</i> (3·5)                                                                                                                                                    | Probable              | Escalation | Extended duration of IV antibiotic treatment                                    |
| p140 |  | Urine: <i>E. coli</i>                                              | <i>E. coli</i> (5·9)                                                                                                                                                          | Probable              | Escalation | Extended duration of IV antibiotic treatment                                    |
| p143 |  | Urine:<br><i>Enterococcus spp.</i> ,<br>Wound: <i>Proteus spp.</i> | <i>C. difficile</i> (0·5)                                                                                                                                                     | Unlikely              | None       |                                                                                 |
| p164 |  | Urine: <i>E. coli</i>                                              | <i>E. coli</i> (8)                                                                                                                                                            | Probable              | Escalation | Extended duration of IV antibiotic treatment                                    |
| p173 |  | Urine:<br><i>Enterococcus spp.</i>                                 | <i>Klebsiella spp.</i> (5·8)<br><i>Acinetobacter bereziniae</i> (1)<br><i>Brevibacterium paucivorans</i> (2)<br><i>Leuconostoc pseudomesenteroides</i> (1·1)                  | Probable              | Escalation | Extended duration of IV antibiotic treatment                                    |

|  |  |  |                                                             |  |  |  |
|--|--|--|-------------------------------------------------------------|--|--|--|
|  |  |  | <i>Pantoea dispersa</i> (1·1)<br><i>Serratia spp.</i> (3·1) |  |  |  |
|--|--|--|-------------------------------------------------------------|--|--|--|

61 Abbreviations: GPM = Genome Equivalents per microliter, KSHV = Kaposi's sarcoma-associated herpesvirus, CMV  
62 = Cytomegalovirus, BAL = bronchoalveolar lavage  
63 \*Consistent with a bronchial lavage culture from a previous hospital admission, which supports the finding of *P.*  
64 *mirabilis* in a patient with LRI focus.

65 **Table S3. Read depth and plasma cfDNA concentration for all patients and blood donors.**

| Patient | DNA concentration (ng/mL) | Read depth (M) |
|---------|---------------------------|----------------|
| p001    | 9.6                       | 2.69           |
| p002    | 3.6                       | 2.1            |
| p012    | 14.3                      | 14.2           |
| p016    | 3.8                       | 5.72           |
| p018    | 9.0                       | 5.22           |
| p019    | 70.9                      | 10.2           |
| p020    | 14.7                      | 1.15           |
| p022    | 4.1                       | 8.11           |
| p027    | 13.1                      | 18.7           |
| p028    | 27.0                      | 9.15           |
| p047    | 24.6                      | 21.4           |
| p049    | 19.2                      | 5.94           |
| p059    | 3.6                       | 9.94           |
| p068    | 2.7                       | 0.629          |
| p072    | 19.1                      | 7.18           |
| p091    | 8.4                       | 10.3           |
| p092    | 8.5                       | 5.44           |
| p098    | 7.4                       | 9.99           |
| p104    | 2.4                       | 16.9           |
| p105    | 21.6                      | 5.61           |
| p106    | 26.9                      | 6.48           |
| p114    | 6.0                       | 18.2           |
| p120    | 0.6                       | 1.67           |
| p127    | 2.8                       | 11.8           |
| p128    | 34.8                      | 17.3           |
| p136    | 16.6                      | 18.3           |
| p139    | 10.1                      | 9.4            |

|      |       |      |
|------|-------|------|
| p140 | 10.0  | 16.6 |
| p141 | 35.1  | 5.65 |
| p143 | 19.2  | 11.3 |
| p146 | 2.3   | 11.7 |
| p150 | 152.1 | 6.3  |
| p151 | 16.3  | 11.6 |
| p156 | 10.9  | 4.22 |
| p162 | 8.3   | 12.7 |
| p164 | 21.6  | 12.6 |
| p172 | 13.0  | 15.5 |
| p173 | 13.7  | 10.4 |
| p175 | 9.1   | 21   |
| p183 | 136.8 | 10.5 |
| d001 | 4.3   | 6.47 |
| d002 | 4.5   | 10.3 |
| d003 | 2.1   | 8.57 |
| d004 | 1.3   | 10.4 |
| d005 | 1.1   | 5.48 |
| d006 | 2.4   | 13.6 |
| d007 | 1.4   | 3.24 |
| d008 | 0.8   | 14.5 |
| d009 | 7.5   | 11.6 |
| d010 | 2.3   | 16.7 |
| d011 | 4.2   | 17.6 |
| d012 | 2.7   | 2    |

66  
67

68 **References**

- 69 1. Blauwkamp TA, Thair S, Rosen MJ, Blair L, Lindner MS, Vilfan ID, et al. Analytical and clinical validation of  
70 a microbial cell-free DNA sequencing test for infectious disease. *Nat Microbiol.* 2019 Apr;4(4):663–74.
- 71 2. Feng S, Rao G, Wei X, Fu R, Hou M, Song Y, et al. Clinical metagenomic sequencing of plasma microbial cell-  
72 free DNA for febrile neutropenia in patients with acute leukaemia. *Clin Microbiol Infect.* 2024 Jan;30(1):107–  
73 13.
- 74 3. Lambden S, Laterre PF, Levy MM, Francois B. The SOFA score-development, utility and challenges of accurate  
75 assessment in clinical trials. *Crit Care.* 2019 Nov 27;23(1):374.
